# Supplementary material for: Intermittent fasting reduces alpha-synuclein pathology and functional decline in a mouse model of Parkinson’s disease
Source: Springer Nature journal article supplement (doi:10.1038/s41467-025-59249-5), 2025-05-14
Supplement: MOESM1 [file 41467_2025_59249_MOESM1_ESM.pdf]

## **Supplemental Material to:**

### **Intermittent fasting reduces alpha-synuclein pathology and functional decline in a mouse model of Parkinson's disease**

Éva M. Szegő<sup>1,2,3\*</sup>, Lennart Höfs<sup>1,3</sup>, Anna Antoniou<sup>4,5</sup>, Elisabeth Dinter<sup>1,2</sup>, Nadine Bernhardt<sup>6</sup>, Anja Schneider<sup>2,4</sup>, Donato A. Di Monte<sup>2</sup>, Björn H. Falkenburger<sup>1,3#</sup>

<sup>1</sup> Department of Neurology, TU Dresden, Dresden, Germany

<sup>2</sup> German Center for Neurodegenerative Diseases (DZNE), Bonn, Germany

<sup>3</sup> German Center for Neurodegenerative Diseases (DZNE), Dresden, Germany

<sup>4</sup> Department of Old Age Psychiatry and Cognitive Disorders, University Hospital Bonn, University of Bonn, Bonn, Germany

<sup>5</sup> Department of Pharmaceutical Sciences, University of Vienna, Vienna, Austria

<sup>6</sup> Department of Psychiatry and Psychotherapy, TU Dresden, Dresden, Germany

#### **Table of Contents:**

1. List of abbreviations
2. Supplemental Tables
3. Supplemental Figures
4. Code used for analysis of Transcriptomic data

**1. List of abbreviations**

|                |                                                                                         |
|----------------|-----------------------------------------------------------------------------------------|
| AL             | ad libitum                                                                              |
| ALP            | autophago-lysosomal pathway                                                             |
| AMPK           | 5' AMP-activated protein kinase                                                         |
| aSyn           | alpha synuclein                                                                         |
| Bdnf           | brain-derived neurotrophic factor                                                       |
| BHB            | beta-hydroxybutyric acid                                                                |
| Fizz2          | resistin-like molecule beta/found in inflammatory zone 2                                |
| Gba            | Lysosomal Acid Glucosylceramidase                                                       |
| Gdnf           | glial cell-derived neurotrophic factor                                                  |
| GFAP           | glial fibrillary acidic protein                                                         |
| GFP            | green fluorescent protein                                                               |
| hm aSyn        | human alpha synuclein                                                                   |
| Iba1           | ionized calcium-binding adapter molecule 1                                              |
| IF             | intermittent fasting                                                                    |
| Igf1           | insulin like growth factor 1                                                            |
| Il-4           | interleukin-4                                                                           |
| Irs1           | insulin receptor substrate 1                                                            |
| LAMP1          | lysosomal-associated membrane protein 1                                                 |
| LB             | Lewy body                                                                               |
| LC3            | microtubule-associated proteins 1A/1B light chain 3B                                    |
| LN             | Lewy neurite                                                                            |
| Mcoln          | mucolipin-1, transient receptor potential cation channel, mucolipin subfamily, member 1 |
| mTOR           | mammalian target of rapamycin                                                           |
| Nos2           | nitric oxide synthase 2 (inducible)                                                     |
| PD             | Parkinson's disease                                                                     |
| PGC-1 $\alpha$ | peroxisome proliferator-activated receptor $\gamma$ coactivator 1 $\alpha$              |
| phospho-aSyn   | phosphorylated (S129) alpha synuclein                                                   |
| PSD95          | postsynaptic density protein 95                                                         |
| rAAV           | adeno-associated viral vector                                                           |
| SN             | substantia nigra                                                                        |
| STR            | striatum                                                                                |
| Tfeb           | transcription factor EB                                                                 |
| TH             | tyrosine hydroxylase                                                                    |
| Tnfa           | tumor necrosis factor                                                                   |
| ULK1           | Unc-51 like autophagy activating kinase 1                                               |
| Ym1            | chitinase-3-like                                                                        |

## 2. Supplemental Tables

### Supplemental Table S1.– List of materials and antibody dilutions

| Antibody                                 | Dilution | Source                  | ID                |
|------------------------------------------|----------|-------------------------|-------------------|
| Anti-Iba1, rabbit                        | 1:1000   | Fujifilm Wako Chemicals | Cat# 019-19741    |
| Anti-GFAP, chicken                       | 1:2000   | Abcam                   | Cat# ab4674       |
| Anti-Tubulin $\beta$ III, rabbit         | 1:5000   | Covance                 | Cat# PRB-435P     |
| Anti-phospho-aSyn, rabbit                | 1:1000   | Abcam                   | Cat# ab51253      |
| Anti-aSyn, human specific, rat           | 1:800    | Enzo                    | Cat# ALX-804-258  |
| Anti-aSyn, rodent specific, rabbit       | 1:1000   | Cell Signaling          | Cat# 4179         |
| Anti-TH, sheep                           | 1:2000   | Pel Freez               | Cat# P40101       |
| Anti-PSD95, rabbit                       | 1:1000   | Synaptic Systems        | Cat# 160002       |
| Anti-LC3, rabbit                         | 1:1000   | Cell Signaling          | Cat# 2775         |
| Anti LAMP1, rabbit                       | 1:1000   | Cell Signaling          | Cat# 9091         |
| Anti-MAP2, chicken                       | 1:4000   | Abcam                   | Cat# ab5392       |
| Anti-Synapsin, chicken                   | 1:1000   | Synaptic System         | Cat# 106006       |
| Anti-MAP2, A488 conjugated, rabbit       | 1:500    | Abcam                   | Cat#: ab225316    |
| Anti-53BP1, rabbit                       | 1:1000   | Thermo Fisher           | Cat#: PA5-54565   |
| Anti-SQSTM1/p62, rabbit                  | 1:10000  | Abcam                   | Cat#: ab109012    |
| Anti-NLRP3, mouse                        | 1:1000   | AdipoGen                | Cat#: AG-20B-0014 |
| Anti-Arginase-1, mouse                   | 1:2000   | BD Biosciences          | Cat#: 610708      |
| Anti-CD206/MRC1, rabbit                  | 1:300    | Thermo Fisher           | Cat#: PA5-114370  |
| Anti-TNF, rabbit                         | 1:1000   | Thermo Fisher           | Cat#: PA1-40281   |
| HRP conjugated donkey anti-mouse IgG     | 1:5000   | Jackson ImmunoResearch  | Cat# 715-035-150  |
| HRP conjugated donkey anti-rabbit IgG    | 1:5000   | Jackson ImmunoResearch  | Cat# 711-035-152  |
| HRP conjugated goat anti-mouse IgG       | 1:5000   | Bio-Rad                 | Cat#: 1706516     |
| Alexa 555 conjugated donkey anti-rabbit  | 1:2000   | Invitrogen              | Cat# A31572       |
| Alexa 647 conjugated donkey anti-chicken | 1:2000   | Jackson ImmunoResearch  | Cat# 703-605-155  |
| Alexa 488 conjugated donkey anti-sheep   | 1:2000   | Invitrogen              | Cat# A11015       |
| Alexa 488 conjugated donkey anti-rabbit  | 1:2000   | Invitrogen              | Cat# A21206       |

**Reagents and kits**

|                                                   |           |                        |                 |
|---------------------------------------------------|-----------|------------------------|-----------------|
| PhosSTOP phosphatase inhibitor                    |           | Sigma-Aldrich          | Cat# 4906845001 |
| Bromphenol blue                                   |           | Honeywell Fluka        | Cat# 32712      |
| Mini-PROTEAN TGX Precast Gels 4-20%               |           | BioRad                 | Cat# 4561094    |
| Precision Plus Protein WesternC Protein Standards |           | BioRad                 | Cat# 1610376    |
| WesternBright Chemiluminescence Substrate Sirius  |           | Biozym Scientific GmbH | Cat# 541019     |
| Fluoromount-G                                     |           | Southern Biotech       | Cat# 0100-01    |
| LDH Cytotoxicity Detection kit                    |           | Merck                  | Cat# 4744926001 |
| BHB Assay kit                                     |           | Sigma                  | Cat# MAK041     |
| RNeasy Mini Kit                                   |           | Qiagen                 | Cat# 74104      |
| QuantiTect Reverse Transcription kit              |           | Qiagen                 | Cat# 205313     |
| GoTaq®aPCR Master Mix                             |           | Promega                | Cat# A6102      |
| RNeasy Lipid Tissue Mini Kit                      |           | Qiagen                 | Cat#: 74804     |
| NEBNext Ultra II Directional RNA Library Prep Kit |           | New England Biolabs    | Cat#: E7760     |
| CCL17                                             | 40 nM     | Medchem Express        | Cat# HY-P71891A |
| IL-36RN                                           | 100 ng/ml | MedChem Express        | Cat# HY-P77007  |
| CDK2-IN-3                                         | 100 nM    | MedChem Express        | Cat# HY-112460  |
| MJ33                                              | 40 µM     | Santa Cruz             | Cat# sc-221947  |
| Melittin                                          | 2 µM      | MedChem Express        | Cat# HY-P0233   |

**Equipment**

|                                      |                                  |
|--------------------------------------|----------------------------------|
| Infinite 200M Multimode-Plate-Reader | Tecan Group                      |
| CM3050S Kryostat                     | Leica Mikrosysteme Vertrieb GmbH |
| Zeiss Axio Observer Z1               | Carl Zeiss                       |
| Zeiss Spinning Disc                  | Carl Zeiss                       |

**Software**

|                                |                     |
|--------------------------------|---------------------|
| GraphPad Prism 5. 01 and 9.5.0 | GraphPad Software   |
| ImageJ Fiji, 1.47v             | Wayne Rasband (NIH) |



**Supplemental Table S2.– List of animal experiments**

| Exp. | Genotype | Age         | Injection                         | Number /group | Diet            | Diet/post-OP survival | Analyses                                 | Figures                        |
|------|----------|-------------|-----------------------------------|---------------|-----------------|-----------------------|------------------------------------------|--------------------------------|
| 1    | WT       | 8-12 weeks  | Unilateral, rAAV-GFP or rAAV-aSyn | n=4           | only AL         | 4 weeks               | Histology                                | Supl. Fig 1F-H                 |
| 2    | WT       | 8-12 weeks  | Unilateral, rAAV-GFP or rAAV-aSyn | n=7           | AL, IF weeks    | 4 8 weeks             | Behaviour <sup>1</sup> , histology       | Fig1, 2, 4 Supl. Fig1, 2, 3, 5 |
| 3    | WT       | 8-12 weeks  | Unilateral, rAAV-GFP or rAAV-aSyn | n=5           | AL, IF weeks    | 4 8 weeks             | Behaviour <sup>1</sup> , WB, qPCR, HPLC  |                                |
| 4    | tfl-LC3  | 8-12 weeks  | Unilateral, PBS or rAAV-aSyn      | n=4-5         | AL, IF weeks    | 4 8 weeks             | Behaviour <sup>1</sup> , histology       | Fig3, Fig3 Supl.               |
| 5    | WT       | 48-56 weeks | Unilateral, PBS or rAAV-aSyn      | n=4-5         | AL, IF weeks    | 4 8 weeks             | Behaviour <sup>1</sup> , histology       | Supl. Fig1-6                   |
| 6    | WT       | 8-12 weeks  | Unilateral, rAAV-GFP or rAAV-aSyn | n=3           | AL, IF 10 weeks | 12 weeks              | Behaviour <sup>1</sup> , transcriptomics | Fig6                           |

3. <sup>1</sup> Only the behaviour data from experiment 2 are shown in Figure 2.

**Supplemental Table S3.– List of qPCR primers**

| <b>Gene</b>   | <b>Forward primer</b>    | <b>Reverse primer</b>    |
|---------------|--------------------------|--------------------------|
| <i>Ym1</i>    | CATTTCAGTCAGTTATCAGATTCC | AGTGAGTAGCAGCCTTGG       |
| <i>Fizz2</i>  | TGGAGAATAAGGTCAAGGAAC    | GTCAACGAGTAAGCACAGG      |
| <i>Il4</i>    | AGATGGATGTGCCAAACGTCCTCA | AATATGCGAAGCACCTTGGAAGCC |
| <i>Tnfa</i>   | TTCCGAATTCACTGGAGCCTCGAA | TGCACCTCAGGGAAGAATCTGGAA |
| <i>Nos2</i>   | CTGCTGGTGGTGACAAGCACATT  | ATGTCATGAGCAAAGGCGCAGAAC |
| <i>Bdnf</i>   | GGCTGACACTTTTGAGCACGTC   | CTCCAAAGGCACTTGACTGCTG   |
| <i>Gdnf</i>   | CCTTCGCGCTGACCAGTGACT    | GCCGCTTGTTTATCTGGTGACC   |
| <i>Tfeb</i>   | CAGCAGGTGGTGAAGCAAGAGT   | TCCAGGTGATGGAACGGAGACT   |
| <i>Lamp1</i>  | CCAGGCTTTCAAGGTGGACAGT   | GGTAGGCAATGAGGACGATGAG   |
| <i>Mtor</i>   | AGAAGGGTCTCCAAGGACGACT   | GCAGGACACAAAGGCAGCATTG   |
| <i>Igf1</i>   | GTGGATGCTCTTCAGTTCGTGTG  | TCCAGTCTCCTCAGATCACAGC   |
| <i>Irs1</i>   | TGTCACCCAGTGGTAGTTGCTC   | CTCTCAACAGGAGGTTTGGCATG  |
| <i>Mcolm1</i> | GTCGGTGTCAATCGCTACCTGA   | GAACGATCCAGCCACAGAAGCA   |
| <i>Actin</i>  | TGTGATGGTGGGAATGGGTCAGAA | TGTGGTGCCAGATCTTCTCCATGT |
| <i>SNCA</i>   | ACCAAACAGGTGTGGCAGAAG    | CTTGCTCTTGGTCTTCTCAGCC   |
| <i>GFP</i>    | AAGCAGAAGAACGGCATCAA     | GGGGGTGTTCTGCTGGTAGT     |

### 3. Supplemental Figures

#### Supplement to Figure 1.

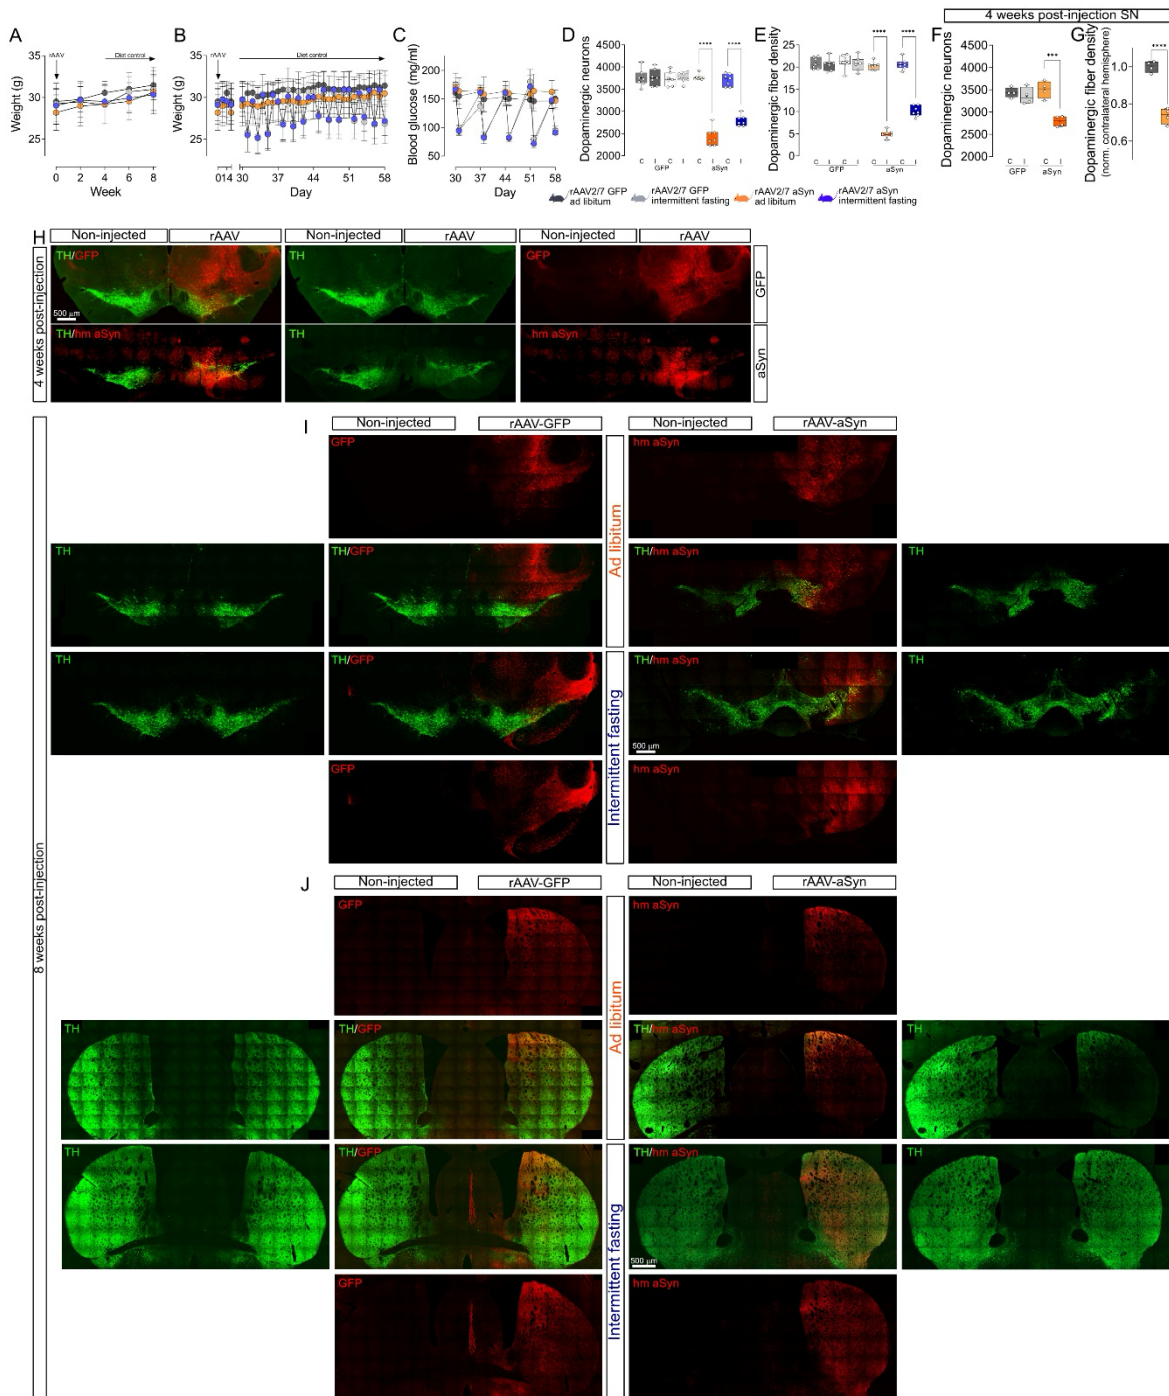

A) Biweekly measured body weight (g), measured after 24 h feeding. Mean  $\pm$  SD, n=12, repeated measures ANOVA, Tukey post-hoc test. B) Daily change in the body weight (g) of mice during the diet control. Mean  $\pm$  SD, n=12, repeated measures ANOVA, Tukey post-hoc test. C) Weekly measured blood glucose concentration (mg/ml) of mice during the diet control, measured after 24 h feeding and 24 h fasting. Mean  $\pm$  SD, n=12, repeated measures ANOVA, Tukey post-hoc test. D) Number of dopaminergic neurons in the SN contralateral (C) and

ipsilateral (I) to injection. Box and whisker plots, middle line: median, +: mean, circles: individual animals; n=7, two-way ANOVA, Tukey post-hoc test, \*\*\*\*:  $p < 0.0001$ . E) Density of dopaminergic fibers in the STR contralateral (C) and ipsilateral (I) to the injection. Box and whisker plots, middle line: median, +: mean, circles: individual animals; n=7, two-way ANOVA, Tukey post-hoc test, \*\*\*\*:  $p < 0.0001$ . F) Number of dopaminergic neurons in the SN contralateral (C) and ipsilateral (I) to the vector injection, four weeks after surgery. Box and whisker plots, middle line: median, +: mean, circles: individual animals; n=4, two-way ANOVA, Tukey post-hoc test,  $p = 0.003$ . G) Density of dopaminergic fibers in the STR contralateral (C) and ipsilateral (I) to the injection, four weeks after surgery. Box and whisker plots, middle line: median, +: mean, circles: individual animals; n=4, two-way ANOVA, Tukey post-hoc test, \*\*\*\*:  $p < 0.0001$ . H) Representative images of midbrain sections, four weeks after the surgery. Sections were stained for TH (green) and for human aSyn or GFP (red). Scale bar: 500  $\mu\text{m}$ . I) Representative images of midbrain sections, eight weeks after the. Sections were stained for TH (green) and for human aSyn or GFP (red). Scale bar: 500  $\mu\text{m}$ . J) Representative images of striatal sections, eight weeks after the surgery. Sections were stained for TH (green) and for human aSyn or GFP (red). Scale bar: 500  $\mu\text{m}$ . Box and whiskers plots: box: 25th to 75th percentiles, whiskers: from the smallest to the largest value. Source data are provided as a Source Data file.

## Supplement to Figure 2.

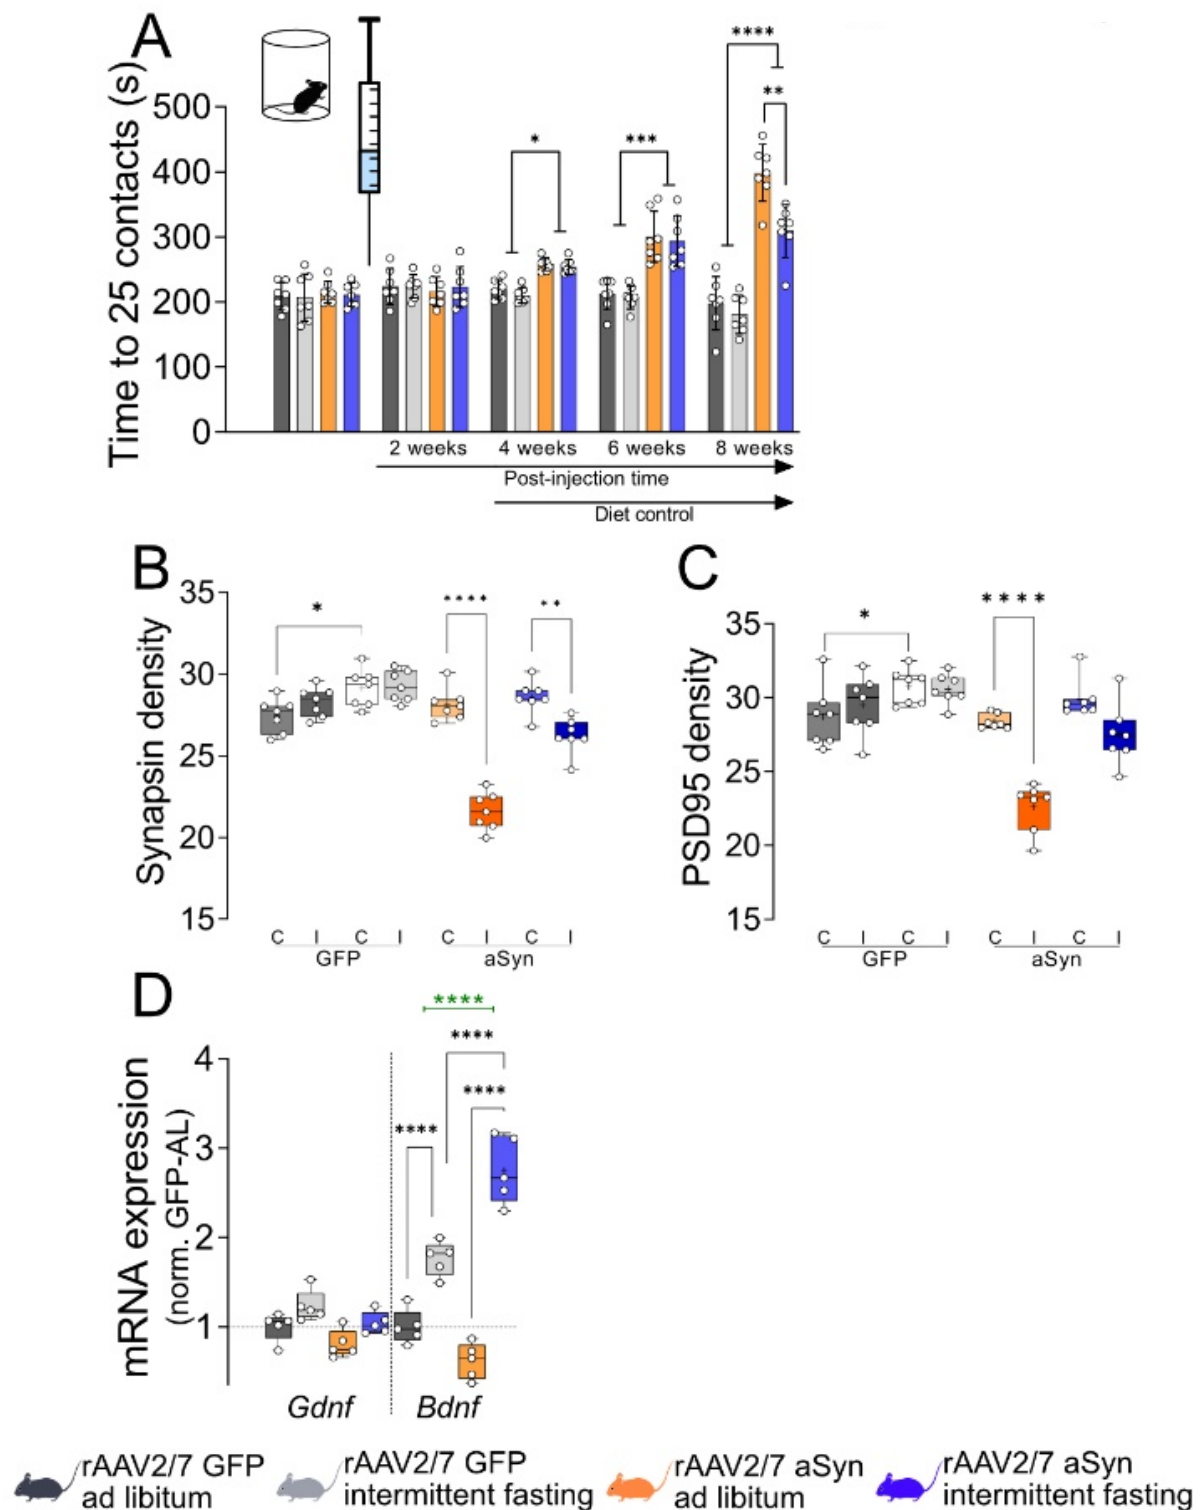

A) Quantification of time (s) until the first 25 paw contacts using the cylinder test. Mice were tested before and two, four, six and eight weeks after the vector injection. Mean  $\pm$  SD, circles: individual animals; n=7, repeated measures ANOVA, Tukey post-hoc test; \* p=0,0127; \*\*\* p=0,00083; \*\* p=0,0089; \*\*\*\*: p<0,0001. B) Density of synapsin-positive structures in the STR contralateral (C) and ipsilateral (I) to the vector injection (measured as area fraction). Box

and whisker plots, middle line: median, +: mean, circles: individual animals; n=7, two-way ANOVA, Tukey post-hoc test, \*\*\*\*:  $p < 0,0001$ , \*\*:  $p = 0,0062$ ; \*:  $p = 0,0076$ . C) Density of PSD95-positive structures in the STR contralateral (C) and ipsilateral (I) to the vector injection (measured as area fraction). Box and whisker plots, middle line: median, +: mean, circles: individual animals; n=7, two-way ANOVA, Tukey post-hoc test, \*\*\*\*:  $p < 0,0001$ ; \*:  $p = 0,0326$ . D) Expression of *Gdnf* and *Bdnf* in the striatum. Box and whisker plots, middle line: median, +: mean, circles: individual animals; n=7, two-way ANOVA, Tukey post-hoc test, \*\*\*\*:  $p < 0,0001$ , green line indicates interactions (genotype and diet). Box and whiskers plots: box: 25th to 75th percentiles, whiskers: from the smallest to the largest value. Source data are provided as a Source Data file. Schemes were created by BioRender.

## Supplement to Figure 3.

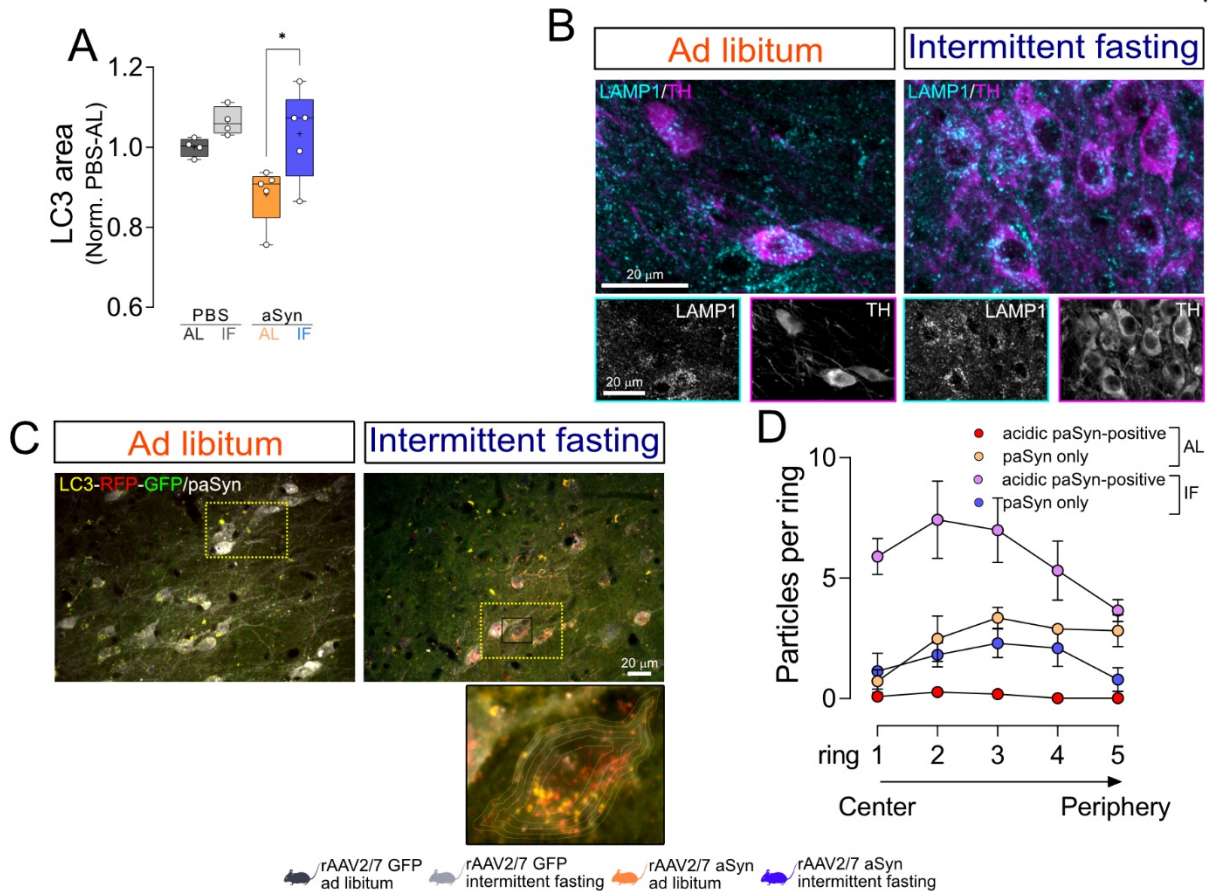

A) Area fraction covered by LC3 signal (RFP channel) in the SN (measured as area fraction). Box and whisker plots, middle line: median, +: mean, circles: individual animals; n=4 for PBS and n=5 for rAAV-aSyn, two-way ANOVA, Tukey post-hoc test, \*: p=0,028. B) Representative images of SN sections of rAAV-aSyn-injected tfl-LC3 animals stained for LAMP1 (cyan) and TH (magenta). Scale bar: 20µm. Lower images: individual channels (gray). C) Representative, low magnification images from the SN of LC3-tfl animals, showing LC3 (red and green) and phospho-aSyn (white) signal. Marked area is shown on Figure 5. D) Average number of acidic, phospho-aSyn-positive (red and purple) vesicles and structures positive only for phospho-aSyn (orange and blue) in each ring based on <sup>23</sup>. Mean ± SD, two-way ANOVA, Tukey post-hoc test. Box and whiskers plots: box: 25th to 75th percentiles, whiskers: from the smallest to the largest value. Source data are provided as a Source Data file. Schemes were created by BioRender.



## Supplement to Figure 5.

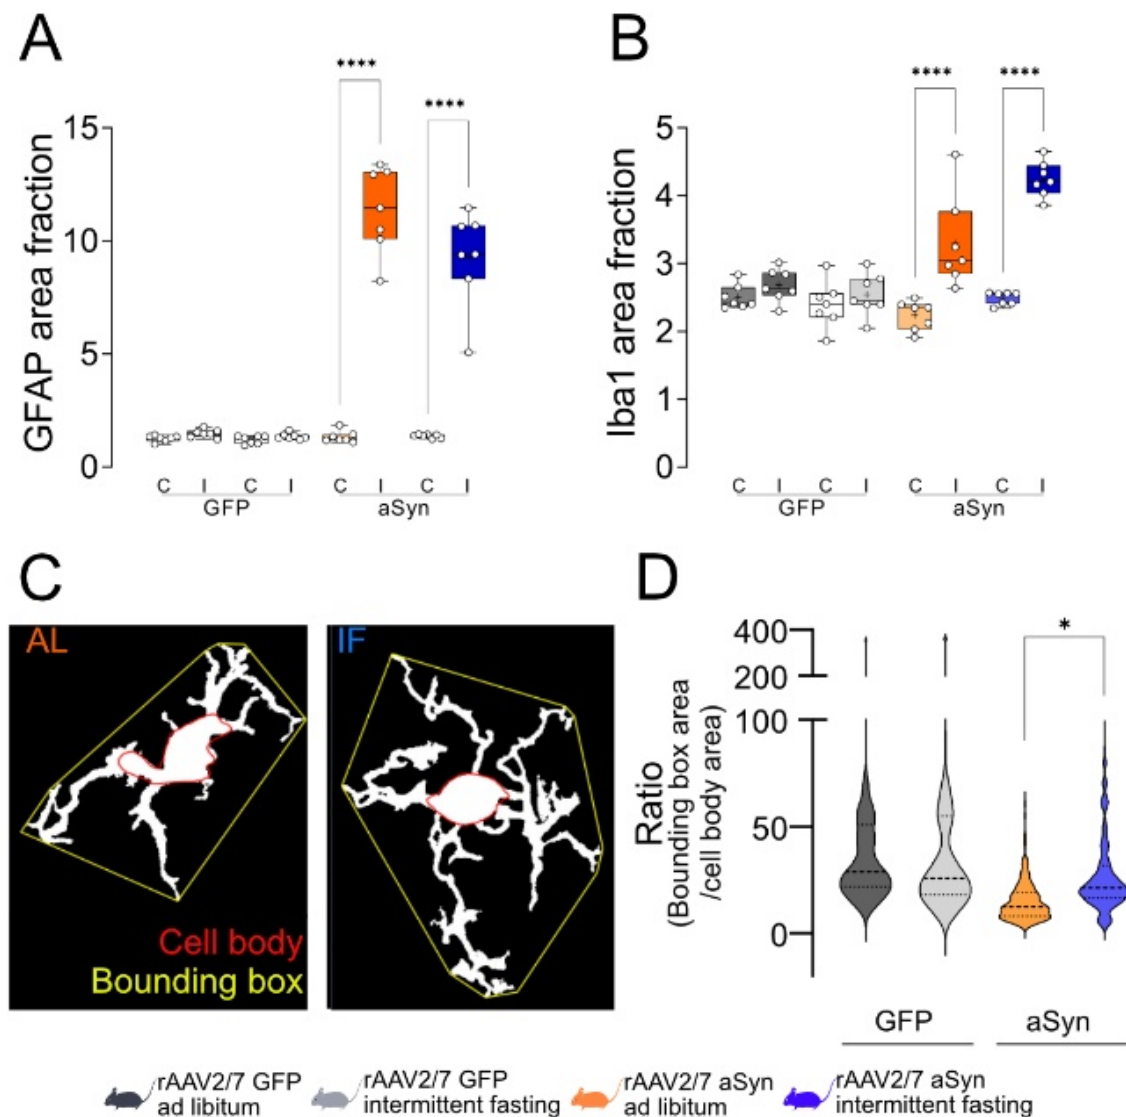

A) Area fraction covered by the GFAP signal in the STR contralateral (C) and ipsilateral (I) to the vector injection (measured as area fraction). Graph shows box and whisker plots, middle line: median, +: mean, circles: individual animals;  $n=7$ , two-way ANOVA, Tukey post-hoc test, \*\*\*\*:  $p<0,0001$ . B) Area fraction covered by the Iba1 signal in the STR contralateral (C) and ipsilateral (I) to the vector injection (measured as area fraction). Graph shows box and whisker plots, middle line: median, +: mean, circles: individual animals;  $n=7$ , two-way ANOVA, Tukey post-hoc test, \*\*\*\*:  $p<0,0001$ . C) Illustration how the bounding box and the cell area were determined for analysis of microglia cell morphology. D) Violin plot of the ratio for bounding box area / cell body area for all minimum 50 cells per animal ( $n=7$  mice) are included in the analysis. Two-way ANOVA, Tukey post-hoc test,  $p=0,012$ , factors: rAAV, diet, animal. Source data are provided as a Source Data file. Schemes were created by BioRender.



## Supplement to Figure 6.

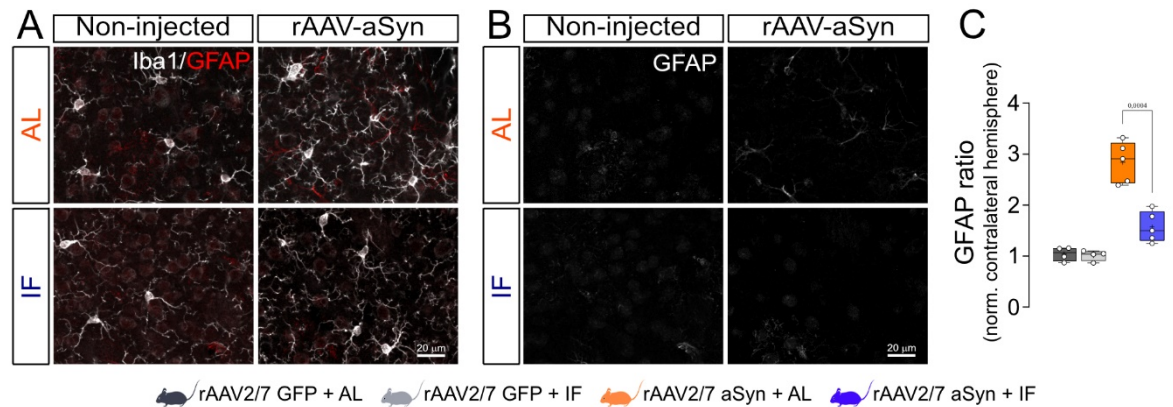

A) Representative images showing Iba1 (gray pseudocolor) and GFAP (red) staining in the striatum of aged animals. Scale bar: 20 $\mu$ m. B) Representative images showing only GFAP staining in the striatum of aged animals, as in panel (A). Scale bar: 20 $\mu$ m. C) Area fraction positive for GFAP signal, normalized to the i) contralateral hemisphere of the same animal and to the ii) PBS–AL group. Box and whisker plots, middle line: median, +: mean, circles: individual animals; n=4 (PBS) or n=5 (rAAV aSyn), two-way ANOVA, Tukey post-hoc test. Box and whiskers plots: box: 25th to 75th percentiles, whiskers: from the smallest to the largest value. Source data are provided as a Source Data file. Schemes were created by BioRender.

**Supplement to Figure 8.**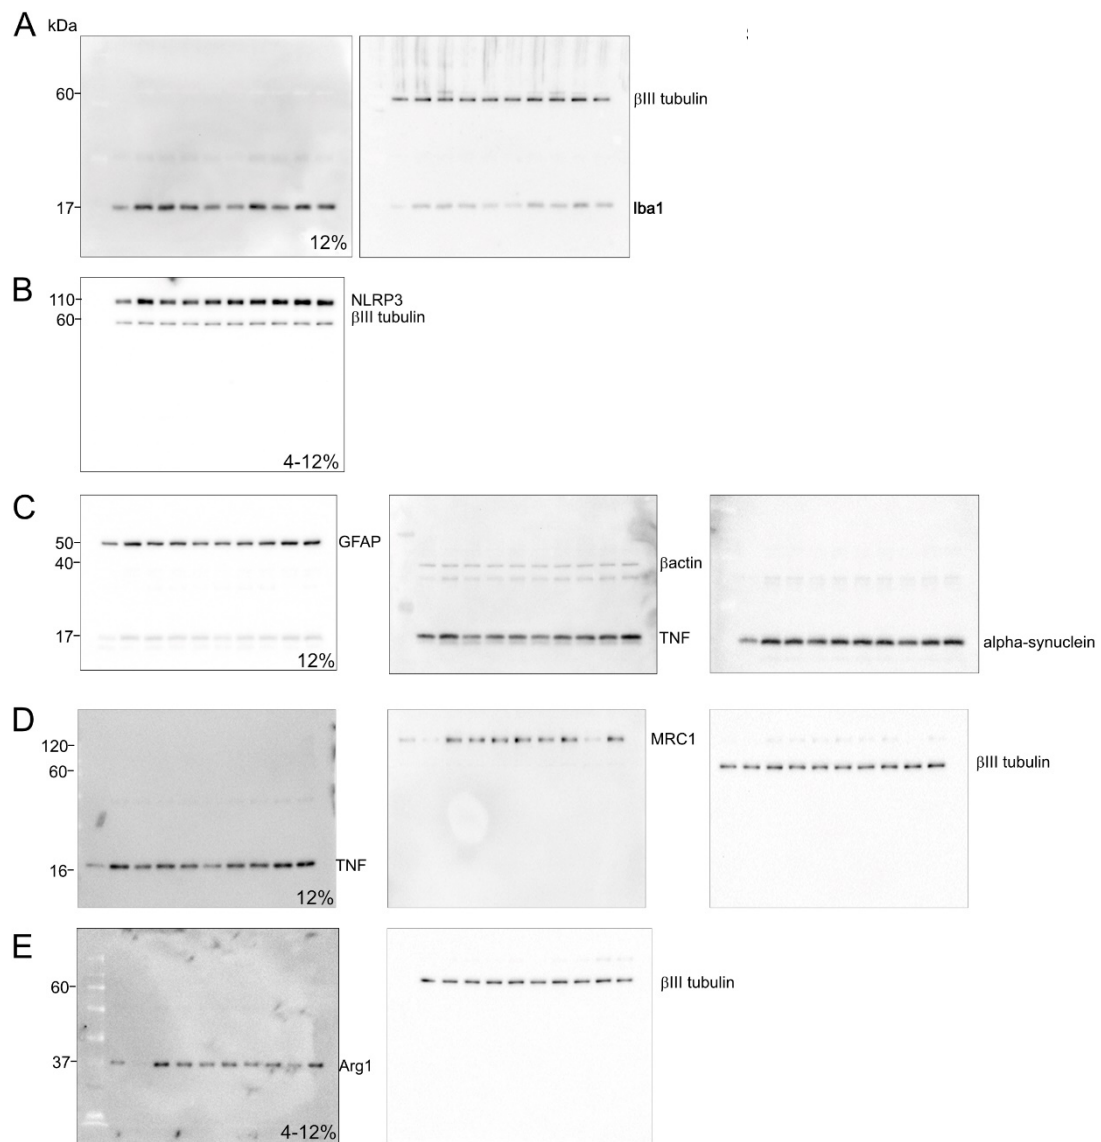

Uncropped membranes from Figure 8.

**Supplement to Figure 9.**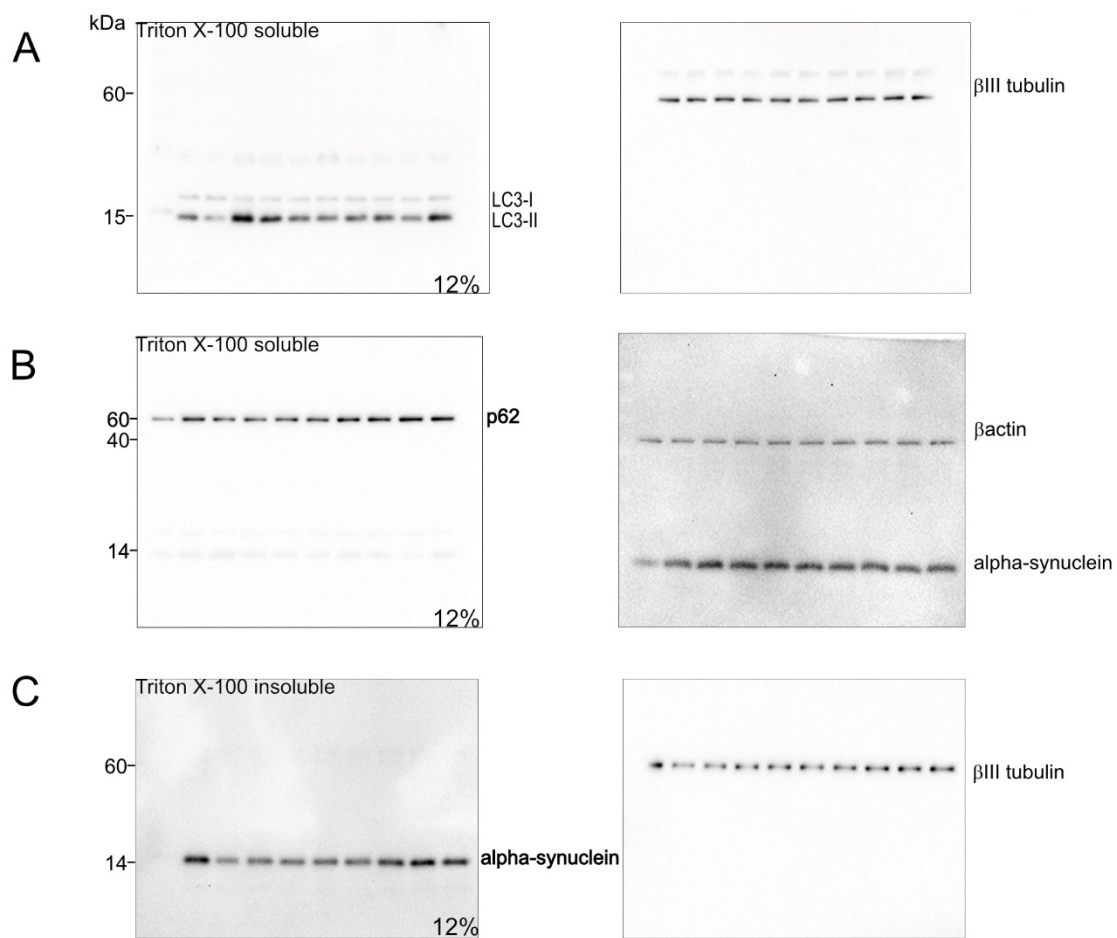

Uncropped membranes from Figure 9.

## Supplement to Figure 10.

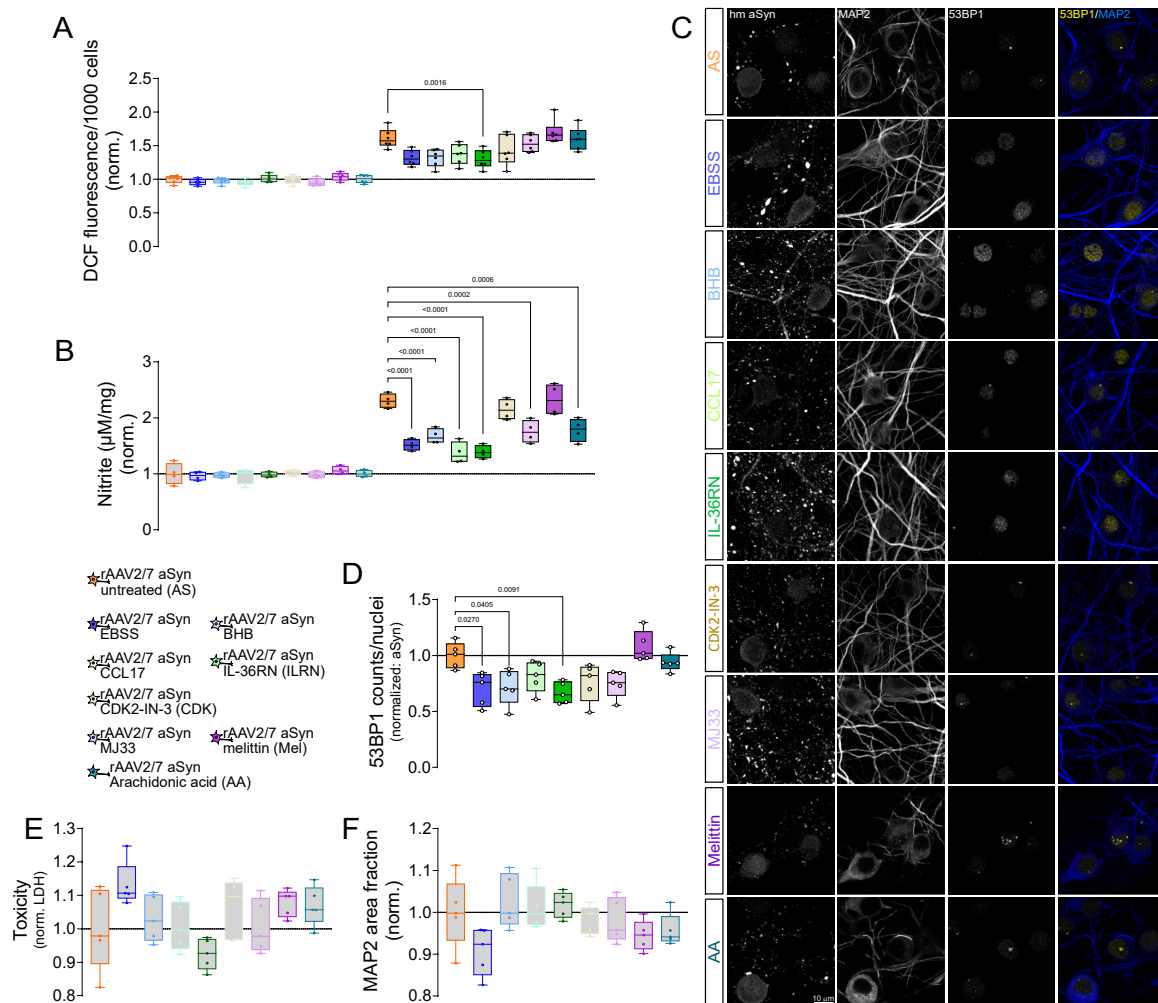

A) Quantification of DCFH-DA fluorescent signal expressed relative to the values measured from the cultures transduced with rAAV-GFP. B) Nitrite levels as markers of nitric oxide activity measured in lysates of primary cultures transduced with rAAV-aSyn. Values are normalized to the mean of rAAV-GFP transduced cultures. C) Representative images of primary neurons stained for the DNA damage response protein 53BP1 (yellow on the composite image), MAP2 (blue on the composite image) and human aSyn. Images show 53BP1-positive foci in the nuclei representing DNA damage sites. Scale bar: 10 μm. D) Mean number of 53BP1-foci per neuronal nucleus (MAP2-positive cells), normalized to non-treated rAAV-aSyn transduced cultures. Graphs show box and whisker plots, middle line: median, circles: individual preparations; n=4-6, one-way ANOVA, Tukey's post-hoc test. p-values are indicated above the connecting lines. E) Quantifications of toxicity (LDH release, normalized to the positive (cultures treated with 1% Triton X-100) and negative (empty medium) controls, and also for the rAAV-GFP control culture) in primary cultures transduced with rAAV-GFP. Data from cultures transduced with rAAV-aSyn are presented on Figure 10. Treatment with the

compounds was optimized to induce no significant cell death in control, rAAV-GFP cultures. Graphs show box and whisker plots, middle line: median, circles: individual preparations; n=5, two-way ANOVA, Tukey's post-hoc test. F) Quantification of the area fraction positive for MAP2-staining in rAAV-GFP-transduced primary cultures. Numbers were normalized to the non-treated rAAV-GFP cultures. Data from cultures transduced with rAAV-aSyn are presented on Figure 10. Graphs show box and whisker plots, middle line: median, circles: individual preparations; n=5, two-way ANOVA, Tukey's post-hoc test. Box and whiskers plots: box: 25th to 75th percentiles, whiskers: from the smallest to the largest value. Source data are provided as a Source Data file. A) Representative images of primary neuronal cultures transduced with rAAV-aSyn and treated as indicated on the left. Cultures were stained against GFAP, MAP2, p129S-aSyn and human aSyn. Scale bar: 20  $\mu$ m. B) Quantification of the area fraction positive for the MAP2-staining in rAAV-aSyn-transduced primary cultures. Numbers were normalized to the control rAAV-GFP group. C) LDH release was measured in cultures treated as indicated and normalized to the positive (cultures treated with 1% Triton X-100) and negative (empty medium) controls, and also for the rAAV-GFP control culture. D) Quantification of the area fraction positive for the human aSyn-staining in rAAV-aSyn-transduced primary cultures. Numbers were normalized to the non-treated rAAV-aSyn cultures. E) Quantification of the fluorescence signal intensity of p129S-aSyn-staining within MAP2-positive neurons in rAAV-aSyn-transduced primary cultures. Numbers were normalized to the non-treated rAAV-aSyn cultures. Graphs show box and whisker plots, middle line: median, box: 25th and 75th percentiles, whiskers: range, circles: individual preparations; n=5, one-way ANOVA, Tukey post-hoc test. p-values are indicated above the connecting lines. Data including the rAAV-GFP treated cultures is included as Supplement to Figure 10.

#### **4. Code for transcriptomic analysis**

# plotting RNAseq data from Lennart of the fasting project

```
library(tidyr)
library(dplyr)
library(ggplot2)
library(hablar)
library(stringr)

# load data
setwd("~/Downloads/")
asyn <- read.table(file = "RNAseq_fasting_asyn_norm.csv", header = TRUE, na.strings = "",
  sep = ",", dec = ".")
wt <- read.table(file = "RNAseq_fasting_wt_norm.csv", header = TRUE, na.strings = "", sep =
  ",", dec = ".")
metadata <- read.table(file = "RNAseq_fasting_metadata.csv", header = TRUE, na.strings =
  "", sep = ",", dec = ".")
head(metadata)

# pivot and merge with metadata
head(asyn)
asyn <- subset(asyn, select=-X)
asyn <- subset(asyn, select=-gene_id)
asyn_long <- pivot_longer(asyn, cols=!external_gene_name, names_to = "track_ID",
  names_prefix = "Track.", values_to = "reads", values_drop_na = FALSE)
head(asyn_long)

wt <- subset(wt, select=-X)
wt <- subset(wt, select=-gene_id)
wt_long <- pivot_longer(wt, cols=!external_gene_name, names_to = "track_ID",
  names_prefix = "Track.", values_to = "reads", values_drop_na = FALSE)
head(wt_long)

metadata <- subset(metadata, select=-X)
metadata2 <- separate(metadata, col=File, into=c(NA, "track_ID"), sep="-")
head(metadata2)

wt_long2 <- merge(wt_long, metadata2)
head(wt_long2)

asyn_long2 <- merge(asyn_long, metadata2)
head(asyn_long2)

##### definitions
# canonical
canonical = c("Aif1", "P2ry12", "Tmem119", "Cx3cr1", "Cxcr4", "Cd9", "Lpl", "Trem2")
asyn_long2$canonical <- asyn_long2$external_gene_name %in% canonical
wt_long2$canonical <- wt_long2$external_gene_name %in% canonical
```

```

m1 = c("Cd86","Tnf","H2-Ab1","Cd68","Ifng","Nos2","Nos1","Isg15","Chil3","Il1b","Fcgr3",
      "Cxcl10","Il6","Irf1","Stat1")
asyn_long2$m1 <- asyn_long2$external_gene_name %in% m1
wt_long2$m1 <- wt_long2$external_gene_name %in% m1

m2 = c("Arg1","Il10","Il13","Bdnf","Gdnf","Cd163","Cd206","Mrc1","Tgfb1","Chil3","Retnla",
      "Ngf")
asyn_long2$m2 <- asyn_long2$external_gene_name %in% m2
wt_long2$m2 <- wt_long2$external_gene_name %in% m2

bdnf =
c("Ntrk2","Ntrk2a","Ntrk2b","Bdnf","Plg","Plat","Mecp2","Syt4","Slc2a4","Slc9a6","Rapgef2",
  "Tiam1","Fstl4","Fam72a")
asyn_long2$bdnf <- asyn_long2$external_gene_name %in% bdnf
wt_long2$bdnf <- wt_long2$external_gene_name %in% bdnf

bdnf2 = c("Ntrk2","Bdnf","Plat","Mecp2","Syt4","Slc2a4","Slc9a6","Tiam1","Fstl4")
asyn_long2$bdnf2 <- asyn_long2$external_gene_name %in% bdnf2
wt_long2$bdnf2 <- wt_long2$external_gene_name %in% bdnf2

microglia_activation=c("Ager","Aif1","App","Atm","C1qa","C5ar1","Casp1","Clu","Csf1r","Cst
7","Ctsc",
  "Cxc3cl1","Cx3cr1","Grn","Hspa4","Ifng","Ifngr1","Il4","Il13","Il33","Itgam",
  "Jak2","Jun","Kcnj8","Ldlr","Lrrk2","Mir7116","Mmp8","Naglu","Nampt","Nr1d1",
  "Pparg","Snca","Sphk1","Stap1","Syt11","Tafa3","Tlr1","Tlr2","Tlr3","Tlr4",
  "Tlr6","Tlr9","Tnf","Trem2","Trpv1","Ttbk1","Tyrobp")
asyn_long2$microglia_activation <- asyn_long2$external_gene_name %in%
microglia_activation
wt_long2$microglia_activation <- wt_long2$external_gene_name %in% microglia_activation

astroglia_activation =c("Adora2a","Ager","Agt","App","C1qa","C5ar1","Cntf","Csf1r","Egfr",
  "Grn","Ifng","Ifngr1","Il1b","Ldlr","Lrp1","Naglu","Nr1d1","Psen","Smo",
  "Trem2","Zeb2")
asyn_long2$astroglia_activation <- asyn_long2$external_gene_name %in%
astroglia_activation
wt_long2$astroglia_activation <- wt_long2$external_gene_name %in% astroglia_activation

autophagy =
stringr::str_to_title(tolower(c("ULK1","ULK2","BECN1","ATG5","ATG7","ATG12","ATG16L1",
SQSTM1","LC3","WIPI1","MTOR","ULK3","TFEB","ATG4B")))
asyn_long2$autophagy <- asyn_long2$external_gene_name %in% autophagy
wt_long2$autophagy <- wt_long2$external_gene_name %in% autophagy

autophagy2 = stringr::str_to_title(tolower(c("ATG5","ATG7","WIPI1","TFEB","ATG4B")))
wt_long2$autophagy2 <- wt_long2$external_gene_name %in% autophagy2

```

```
head(asyn_long2)
head(wt_long2)
```

```
# make plots for asyn
asyn_plot <- asyn_long2[which(asyn_long2$canonical==TRUE), ]
asyn_plot <- asyn_long2[which(asyn_long2$m1==TRUE), ]
asyn_plot <- asyn_long2[which(asyn_long2$m2==TRUE), ]
asyn_plot <- asyn_long2[which(asyn_long2$bdnf==TRUE), ]
p <- ggplot(asyn_plot, aes(x=group, y=reads, color=group)) +
  geom_dotplot(binaxis="y", stackdir="center") +
  facet_grid(cols=vars(external_gene_name), scales="free", space='free') +
  theme_classic() +
  theme(strip.text.x = element_text(angle = 90))
p
```

```
##### normalize to median of all
head(asyn_long2)
df_grouped <- group_by(asyn_long2, external_gene_name)
amount_class <- summarise(df_grouped, median_gene = median(reads), )
head(amount_class)
asyn_long2 <- merge(asyn_long2, amount_class)
asyn_long2$norm_reads <- asyn_long2$reads / asyn_long2$median_gene
```

```
head(wt_long2)
df_grouped <- group_by(wt_long2, external_gene_name)
amount_class <- summarise(df_grouped, median_gene = median(reads), )
head(amount_class)
wt_long2 <- merge(wt_long2, amount_class)
wt_long2$norm_reads <- wt_long2$reads / wt_long2$median_gene
head(wt_long2)
```

```
# make plots for asyn
asyn_plot <- asyn_long2[which(asyn_long2$canonical==TRUE), ]
asyn_plot <- asyn_long2[which(asyn_long2$m1==TRUE), ]
asyn_plot <- asyn_long2[which(asyn_long2$m2==TRUE), ]
asyn_plot <- asyn_long2[which(asyn_long2$bdnf==TRUE), ]

p <- ggplot(asyn_plot, aes(x=group, y=norm_reads, color=group)) +
  geom_violin() +
  geom_dotplot(binaxis="y", stackdir="center") +
  facet_grid(cols=vars(external_gene_name), scales="free", space='free') +
  theme_classic() +
  theme(axis.text.x = element_text(angle = 90))
p
```



```
asyn_plot <- asyn_long2[which(asyn_long2$microglia_activation==TRUE), ]
asyn_plot <- asyn_long2[which(asyn_long2$astroglia_activation==TRUE), ]
asyn_plot <- asyn_plot[which(asyn_plot$external_gene_name != "Adora2a"), ]
asyn_plot <- asyn_long2[which(asyn_long2$autophagy==TRUE), ]

p <- ggplot(asyn_plot, aes(x=external_gene_name, y=norm_reads, color=group)) +
  geom_violin() +
  geom_dotplot(binaxis="y", stackdir="center") +
  facet_grid(cols=vars(group), scales="free", space='free') +
  theme_classic() +
  theme(axis.text.x = element_text(angle = 90))
p
```

```
# make plots for wt
wt_plot <- wt_long2[which(wt_long2$canonical==TRUE), ]
wt_plot <- wt_long2[which(wt_long2$m1==TRUE), ]
wt_plot <- wt_long2[which(wt_long2$m2==TRUE), ]
wt_plot <- wt_long2[which(wt_long2$bdnf==TRUE), ]

p <- ggplot(wt_plot, aes(x=group, y=norm_reads, color=group)) +
  geom_violin() +
  geom_dotplot(binaxis="y", stackdir="center") +
  facet_grid(cols=vars(external_gene_name), scales="free", space='free') +
  theme_classic() +
  theme(axis.text.x = element_text(angle = 90))
p
```

```
wt_plot <- wt_long2[which(wt_long2$microglia_activation==TRUE), ]
wt_plot <- wt_long2[which(wt_long2$astroglia_activation==TRUE), ]
wt_plot <- wt_plot[which(wt_plot$external_gene_name != "Adora2a"), ]
wt_plot <- wt_long2[which(wt_long2$autophagy==TRUE), ]

p <- ggplot(wt_plot, aes(x=external_gene_name, y=norm_reads, color=group)) +
  geom_violin() +
  geom_dotplot(binaxis="y", stackdir="center") +
  facet_grid(cols=vars(group), scales="free", space='free') +
  theme_classic() +
  theme(axis.text.x = element_text(angle = 90))
p
```

```
# heatmap for asyn
asyn_plot <- asyn_long2[which(asyn_long2$bdnf==TRUE), ]

asyn_plot <- asyn_long2[which(asyn_long2$microglia_activation==TRUE), ]
```

```
asyn_plot <- asyn_long2[which(asyn_long2$astroglia_activation==TRUE), ]
asyn_plot <- asyn_plot[which(asyn_plot$external_gene_name != "Adora2a"), ]

asyn_plot <- asyn_long2[which(asyn_long2$autophagy==TRUE), ]

asyn_matrix <- subset(asyn_plot, select=c("external_gene_name", "track_ID",
"norm_reads", "group"))
asyn_matrix$track_ID <- as.character(asyn_matrix$track_ID)
asyn_matrix <- unite(asyn_matrix, col=group_ID, c("group", "track_ID"), sep="-")

p <- ggplot(asyn_matrix, aes(x=group_ID, y=external_gene_name, fill=norm_reads)) +
  geom_tile(color = "black") +
  scale_fill_gradient2(low = "#075AFF",
    mid = "#FFFFCC",
    high = "#FF0000") +
  # coord_fixed() +
  theme_classic() +
  theme(axis.text.x = element_text(angle = 90))
p
```
